# Supplementary material for: The long-standing dilemma of European summer temperatures at the mid-Holocene and other considerations on learning from the past for the future using a regional climate model
Source: Copernicus journal article supplement (doi:10.5194/cp-18-895-2022), 2022-04-22
Supplement: Supplementary file 1 [file cp-18-895-2022-supplement.pdf]

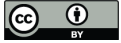

*Supplement of*

**The long-standing dilemma of European summer temperatures at the mid-Holocene and other considerations on learning from the past for the future using a regional climate model**

**Emmanuele Russo et al.**

*Correspondence to:* Emmanuele Russo ([emmanuele.russo@climate.unibe.ch](mailto:emmanuele.russo@climate.unibe.ch))

The copyright of individual parts of the supplement might differ from the article licence.

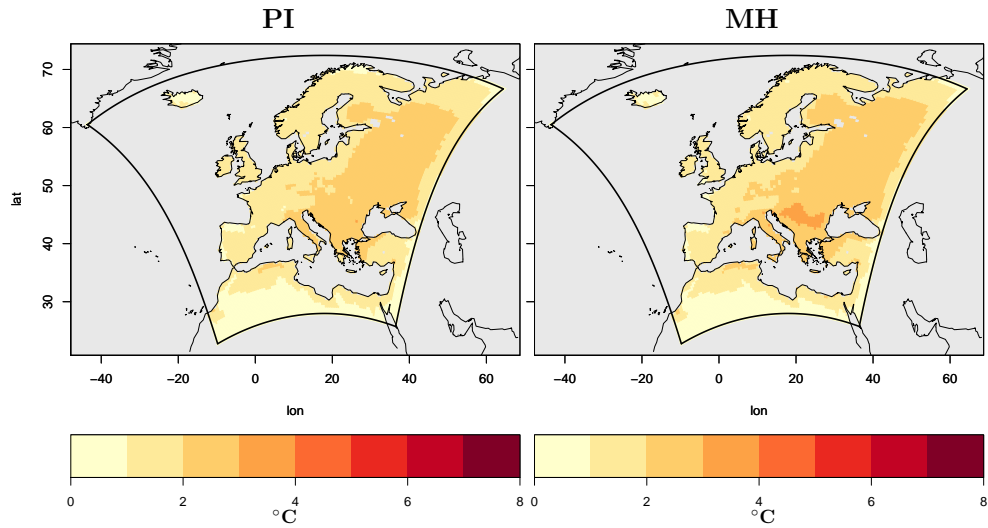

**Figure S1.** Maximum absolute differences in summer 2-meter temperatures calculated between the different PPE members, for the PI (left) and the MH (right) periods.

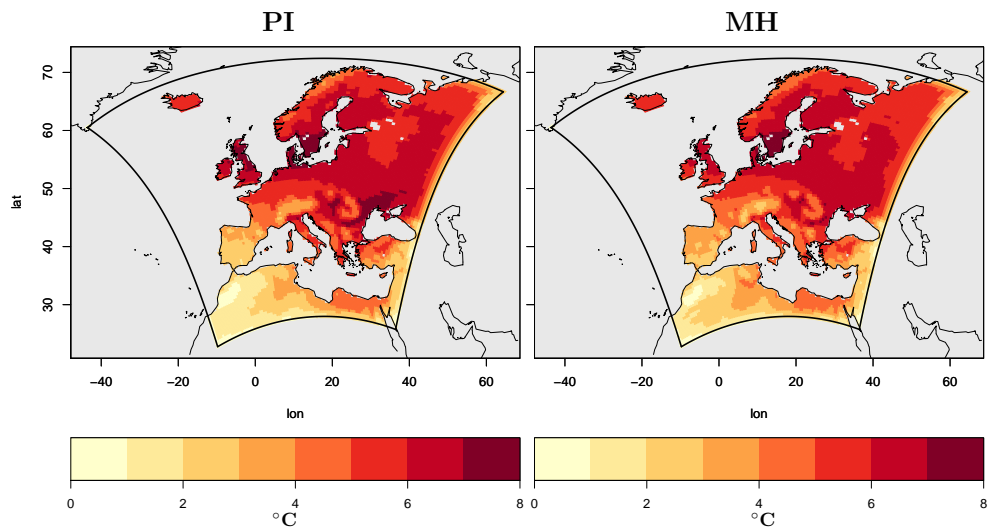

**Figure S2.** Maximum absolute differences in summer 2-meter temperatures calculated between the different PPE members, for the PI (left) and the MH (right) periods.

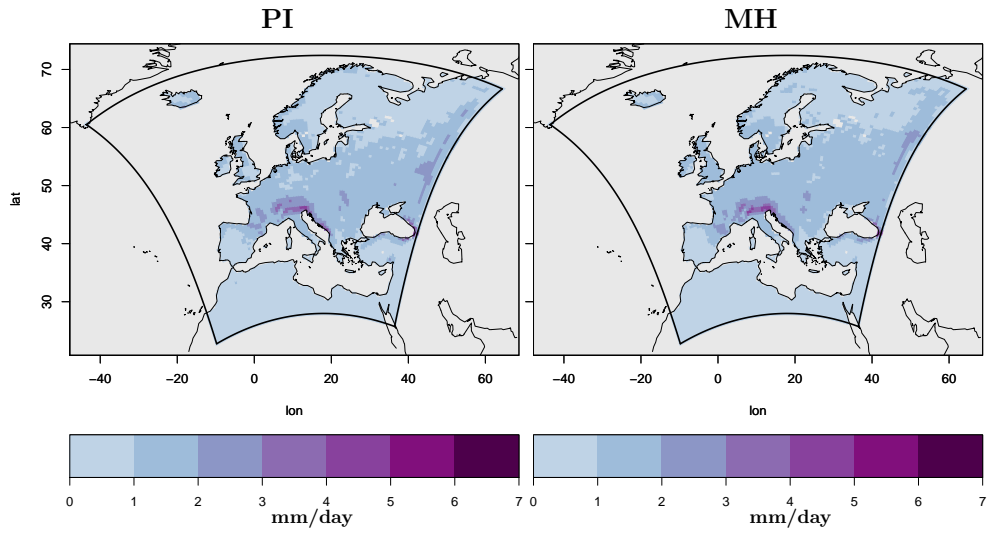

**Figure S3.** Maximum absolute differences in summer daily precipitation calculated between the different PPE members, for the PI (left) and the MH (right) periods.

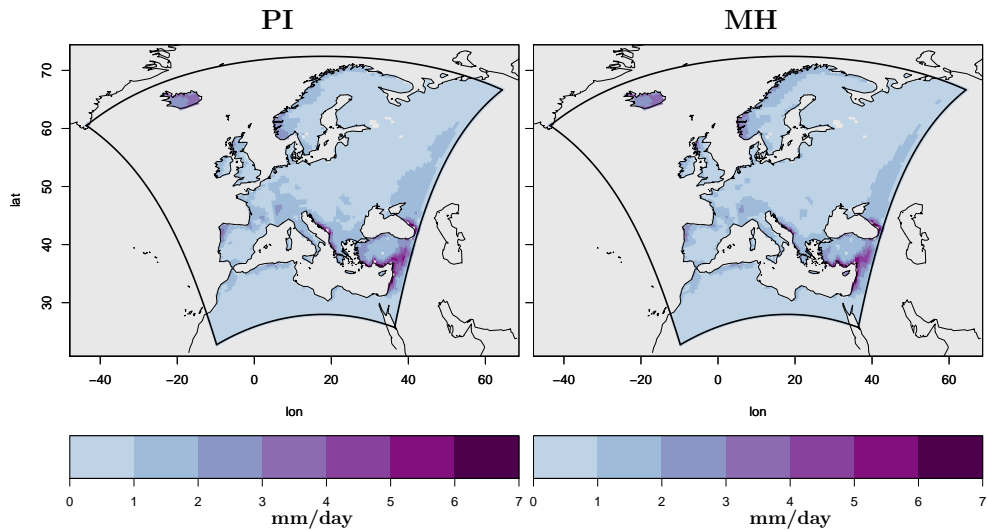

**Figure S4.** Maximum absolute differences in winter daily precipitation calculated between the different PPE members, for the PI (left) and the MH (right) periods.

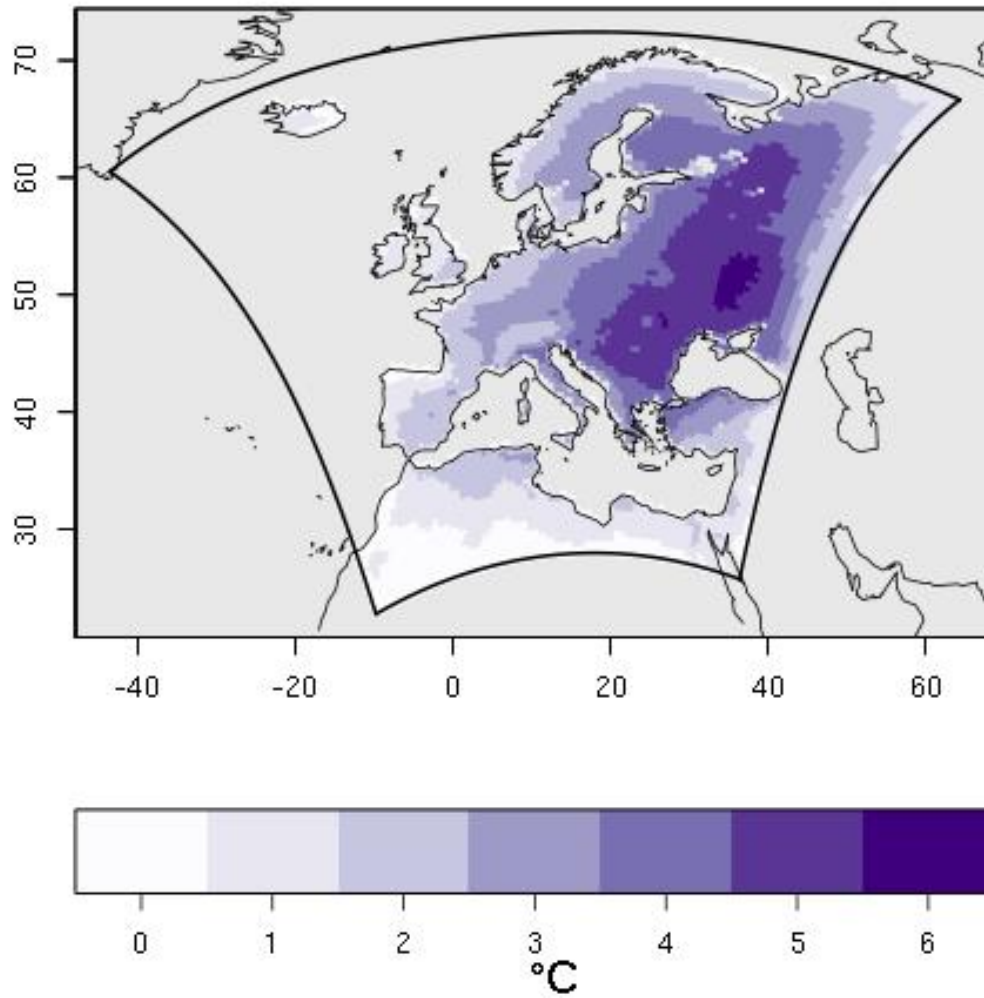

**Figure S5.** Mean value of the absolute differences in MH summer temperatures calculated between the simulation with a reduction of 75% in initial spring soil moisture, and the one with a correspondent increase of 75%, for 6 distinct years of the simulation period.

**Table S1.** Features of TERRA\_LM soil types.

|                                                        | Ice  | Rock | Sand   | Sandy loam | Loam   | Loamy clay | Clay   | Peat   |
|--------------------------------------------------------|------|------|--------|------------|--------|------------|--------|--------|
| <b>Pore volume (-)</b>                                 | -    | -    | 0.364  | 0.445      | 0.455  | 0.475      | 0.507  | 0.863  |
| <b>Field capacity (-)</b>                              | -    | -    | 0.196  | 0.26       | 0.34   | 0.37       | 0.463  | 0.763  |
| <b>Perm. wilting point (-)</b>                         | -    | -    | 0.042  | 0.1        | 0.11   | 0.185      | 0.257  | 0.265. |
| <b>Air dryness point</b>                               | -    | -    | 0.012  | 0.03       | 0.035  | 0.06       | 0.065  | 0.098  |
| <b>Min. infiltration rate (<math>kg/(m^2s)</math>)</b> | -    | -    | 0.0035 | 0.0023     | 0.001  | 0.0006     | 0.0001 | 0.0002 |
| <b>Hydr. diffusivity D0 (<math>10^{-9}m^2s</math>)</b> | -    | -    | 18400  | 3460       | 3570   | 1180       | 442    | 106    |
| <b>Hydr. diffusivity D1 (-)</b>                        | -    | -    | -8.45  | -9.47      | -7.44  | -7.76      | -6.74  | -5.97  |
| <b>Hydr. conductivity K0 (<math>10^{-9}m/s</math>)</b> | -    | -    | 47900  | 9430       | 5310   | 764        | 17     | 58     |
| <b>Hydr. conductivity K1 (-)</b>                       | -    | -    | -19.27 | -20.86     | -19.66 | -18.52     | -16.32 | -16.48 |
| <b>Heat capacity (<math>10^6 J/(m^3K)</math>)</b>      | 1.92 | 2.1  | 1.28   | 1.35       | 1.42   | 1.5        | 1.63   | 0.58   |
| <b>Heat conductivity k0 (<math>W/Km</math>)</b>        | 2.26 | 2.41 | 0.3    | 0.28       | 0.25   | 0.21       | 0.18   | 0.06.  |
| <b>Heat conductivity Dk (<math>W/Km</math>)</b>        | 0    | 0    | 2.4    | 2.4        | 1.58   | 1.55       | 1.5    | 0.5    |
| <b>Exponent B (-)</b>                                  | 1    | 1    | 3.5    | 4.8        | 6.1    | 8.6        | 10     | 9      |
| <b>Albedo (-)</b>                                      | 0.7  | 0.3  | 0.3    | 0.25       | 0.25   | 0.25       | 0.25   | 0.2    |
| <b>Wet albedo (-)</b>                                  | -    | -    | 0.44   | 0.27       | 0.24   | 0.23       | 0.22   | 0.1    |

**Table S2.** Ranking of different realizations in the two periods (PI left and MH right) for each of the considered variables, based on the MAE calculated over regional monthly means with respect to the reference simulation of Table 2 of the main manuscript. The simulations are ordered, from top (best) to bottom (worst), based on their MAE rankings (eq. 3 of the main manuscript)

| T2M |    | RR |    | CLCT |    |
|-----|----|----|----|------|----|
| PI  | MH | PI | MH | PI   | MH |
| 14  | 29 | 25 | 27 | 25   | 29 |
| 25  | 14 | 1  | 13 | 1    | 1  |
| 20  | 21 | 31 | 20 | 26   | 18 |
| 1   | 20 | 14 | 24 | 31   | 17 |
| 21  | 19 | 26 | 23 | 10   | 25 |
| 29  | 22 | 15 | 19 | 29   | 10 |
| 22  | 25 | 30 | 18 | 17   | 26 |
| 19  | 18 | 29 | 30 | 11   | 31 |
| 15  | 15 | 21 | 11 | 24   | 11 |
| 18  | 12 | 11 | 10 | 18   | 24 |
| 10  | 10 | 12 | 28 | 30   | 3  |
| 26  | 1  | 10 | 21 | 14   | 30 |
| 3   | 24 | 18 | 16 | 3    | 14 |
| 24  | 26 | 8  | 25 | 21   | 21 |
| 12  | 3  | 28 | 14 | 28   | 28 |
| 11  | 16 | 22 | 31 | 27   | 27 |
| 17  | 31 | 16 | 2  | 22   | 22 |
| 16  | 13 | 17 | 29 | 2    | 2  |
| 31  | 17 | 13 | 6  | 23   | 23 |
| 13  | 11 | 24 | 3  | 20   | 6  |
| 28  | 28 | 20 | 15 | 6    | 20 |
| 27  | 30 | 3  | 22 | 19   | 12 |
| 30  | 27 | 19 | 26 | 12   | 19 |
| 8   | 8  | 2  | 1  | 4    | 15 |
| 23  | 23 | 27 | 17 | 15   | 4  |
| 4   | 4  | 9  | 12 | 8    | 8  |
| 2   | 2  | 23 | 8  | 13   | 13 |
| 6   | 6  | 4  | 9  | 7    | 7  |
| 9   | 9  | 6  | 4  | 16   | 16 |
| 7   | 7  | 7  | 7  | 9    | 9  |
| 5   | 5  | 5  | 5  | 5    | 5  |
